# Supplementary material
Source: PubMed Central journal article supplement (PMC2662231)
Supplement: M805643200_1.pdf [file M805643200_1.pdf]

## SUPPLEMENTARY MATERIAL

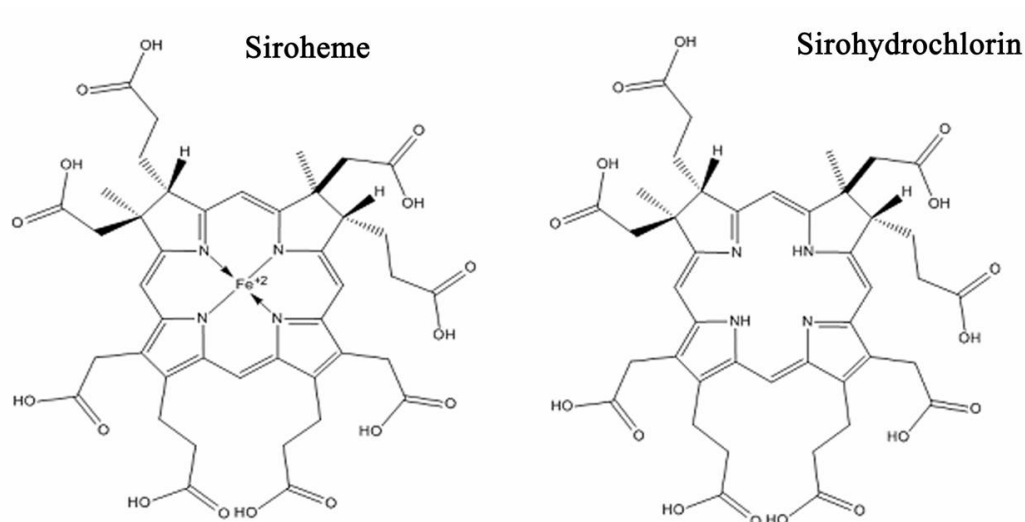

Figure S1 – Schematic representation of the siroheme and sirohydrochlorin molecules. Images generated in ChemBioDraw – version 11.0.1, CambridgeSoft – Life Science Enterprise Solutions.

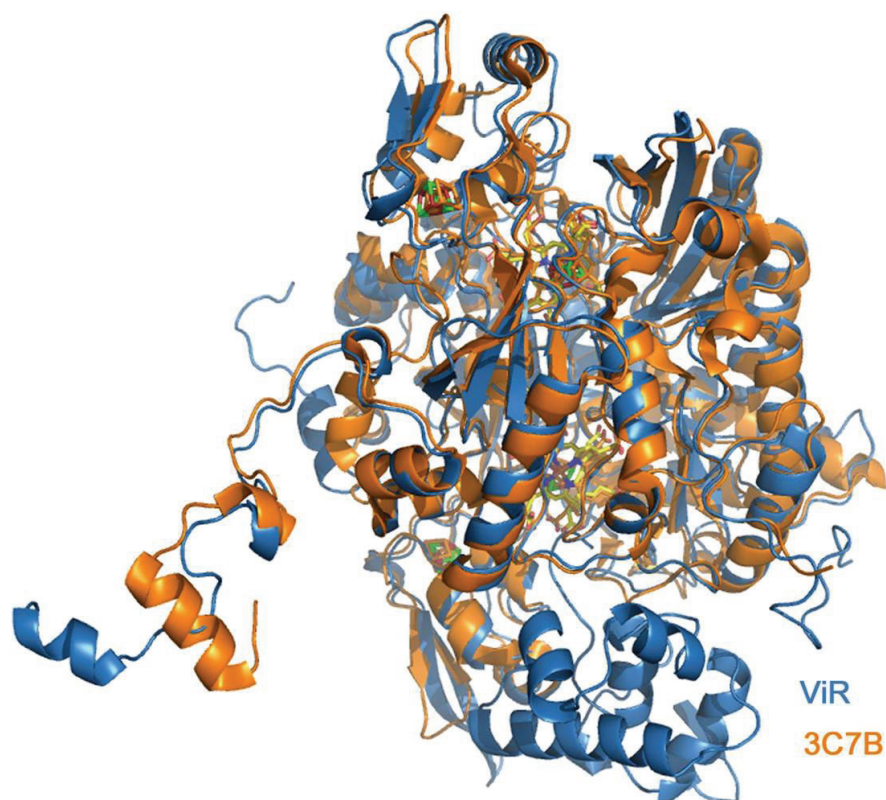

Figure S2 – Superposition of one  $\alpha\beta\gamma$  unit of *D. vulgaris* dSiR (DsrAB and DsrC) in blue and *A. fulgidus* dSiR (DsrAB, PDB code: 3C7B) in orange. The cofactors are color coded for Dvir and displayed in orange for 3C7B model.
